# Supplementary material for: Photoswitchable fluorescent diarylethene derivatives with short alkyl chain substituents
Source: Royal Society of Chemistry journal article supplement (doi:10.1039/c2pp25078k), 2012-07-02
Supplement: c2pp25078k.pdf [file c2pp25078k.pdf]

## Electronic Supplementary Information

### Photoswitchable fluorescent diarylethene derivatives with short alkyl chain substituents

**Yuta Takagi,<sup>a</sup> Tomohiro Kunishi,<sup>b</sup> Tetsuro Katayama,<sup>b</sup> Yukihide Ishibashi,<sup>b</sup> Hiroshi Miyasaka,<sup>b</sup> Masakazu Morimoto<sup>a</sup> and Masahiro Irie\*<sup>a</sup>**

<sup>a</sup> *Department of Chemistry and Research Center for Smart Molecules, Rikkyo University, Nishi-Ikebukuro 3-34-1, Toshima-ku, Tokyo 171-8501, Japan*

<sup>b</sup> *Division of Frontier Materials Science, Graduate School of Engineering Science, Center for Quantum Science and Technology under Extreme Conditions, Osaka University, Toyonaka, Osaka 560-8531, Japan*

**Analytical data of 1a, 3a and 4a:** In the following  $^1\text{H}$  NMR data, ap and p indicate the proton signals assigned to antiparallel and parallel conformations of the open-ring isomers, respectively.

1,2-Bis(2-methyl-6-phenyl-1-benzothiophen-1,1-dioxide-3-yl)perfluorocyclopentene (**1a**):  $\delta_{\text{H}}$  (400 MHz;  $\text{CDCl}_3$ ;  $\text{Me}_4\text{Si}$ ) 2.11 (3 H, s,  $\text{CH}_3$ , ap), 2.24 (3 H, s,  $\text{CH}_3$ , p), 7.22-7.28 (2 H, m, aromatic), 7.43-7.59 (10 H, m, aromatic), 7.64 (1 H, d,  $J = 7.6$  Hz, aromatic, p), 7.80 (1 H, d,  $J = 7.6$  Hz, aromatic, ap), 7.93 (1 H, s, aromatic, p), 7.98 (1 H, s, aromatic, ap).  $m/z$  684 ( $\text{M}^+$ ). Found: C, 61.55; H, 3.42; S, 9.35. Calc. for  $\text{C}_{35}\text{H}_{22}\text{F}_6\text{O}_4\text{S}_2$ : C, 61.40; H, 3.24; S, 9.37%.

1,2-Bis(2-*n*-propyl-6-phenyl-1-benzothiophen-1,1-dioxide-3-yl)perfluorocyclopentene (**3a**):  $\delta_{\text{H}}$  (400 MHz;  $\text{CDCl}_3$ ;  $\text{Me}_4\text{Si}$ ) 0.82 (3.9 H, t,  $J = 7.2$  Hz,  $\text{CH}_3$ , ap), 1.08 (2.1 H, t,  $J = 7.2$  Hz,  $\text{CH}_3$ , p), 1.34-1.43 (1.4 H, m,  $\text{CH}_2$ , p), 1.74-1.99 (2.6 H, m,  $\text{CH}_2$ , ap), 2.29-2.69 (4 H, m,  $\text{CH}_2$ ), 7.20 (0.7 H, d,  $J = 8.0$  Hz, aromatic, p), 7.29 (1.3 H, d,  $J = 8.0$  Hz, aromatic, ap), 7.40-7.61 (10.7 H, m, aromatic), 7.81 (1.3 H, dd,  $J = 8.0$  and 1.2 Hz, aromatic, ap), 7.89 (0.7 H, d,  $J = 1.2$  Hz, aromatic, p), 7.97 (1.3 H, d,  $J = 1.2$  Hz, aromatic, ap).  $m/z$  740 ( $\text{M}^+$ ). Found: C, 63.40; H, 4.02; S, 8.93. Calc. for  $\text{C}_{39}\text{H}_{30}\text{F}_6\text{O}_4\text{S}_2$ : C, 63.23; H, 4.08; S, 8.66%.

1,2-Bis(2-*n*-butyl-6-phenyl-1-benzothiophen-1,1-dioxide-3-yl)perfluorocyclopentene (**4a**):  $\delta_{\text{H}}$  (400 MHz;  $\text{CDCl}_3$ ;  $\text{Me}_4\text{Si}$ ) 0.76 (3.9 H, t,  $J = 7.2$  Hz,  $\text{CH}_3$ , ap), 1.00 (2.1 H, t,  $J = 7.2$  Hz,  $\text{CH}_3$ , p), 1.05-1.36 (4.0 H, m,  $\text{CH}_2$ ), 1.43-1.96 (4 H, m,  $\text{CH}_2$ ), 2.26-2.68 (4 H, m,  $\text{CH}_2$ ), 7.20 (0.7 H, d,  $J = 8.0$  Hz, aromatic, p), 7.30 (1.3 H, d,  $J = 8.0$  Hz, aromatic, ap), 7.40-7.61 (10.7 H, m, aromatic), 7.80 (1.3 H, dd,  $J = 8.0$  and 1.2 Hz, aromatic, ap), 7.89 (0.7 H, d,  $J = 1.2$  Hz, aromatic, p), 7.98 (1.3 H, d,  $J = 1.2$  Hz, aromatic, ap).  $m/z$  768 ( $\text{M}^+$ ). Found: C, 64.09; H, 4.44; S, 8.47. Calc. for  $\text{C}_{41}\text{H}_{34}\text{F}_6\text{O}_4\text{S}_2$ : C, 64.05; H, 4.46; S, 8.34%.

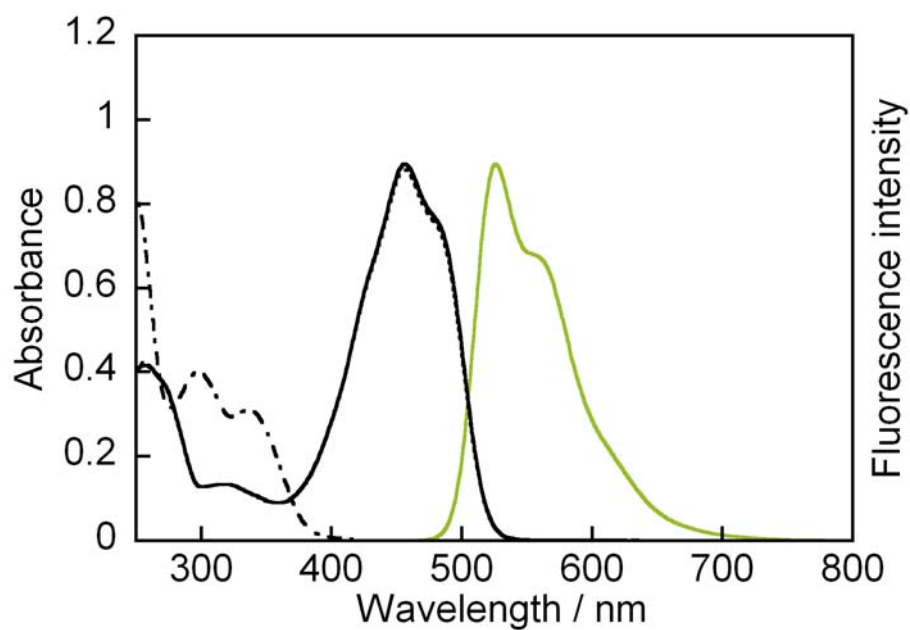

**Fig. S1** Absorption spectra of **3a** (black dashed line), **3b** (black solid line) and photostationary states under irradiation with 330 nm light (black dotted line) and fluorescence spectra of **3b** under irradiation with 450 nm light (green solid line, uncorrected) in 1,4-dioxane ( $2.0 \times 10^{-5}$  M).
